# Supplementary material for: Downregulation of Polyamine and Diamine Oxidases in Silicon-Treated Cucumber
Source: MDPI journal article supplement (doi:10.3390/plants10061248), 2021-06-19
Supplement: s1 [file s1]

## Supplementary Materials

### Downregulation of Polyamine and Diamine Oxidases in Silicon-Treated Cucumber

Anita Szegő<sup>a§</sup>, Iman Mirmazloum<sup>a§</sup>, Zsolt Pónya<sup>abc</sup>, Oyuntogtokh Bat-Erdene<sup>a</sup>, Mohammad Omran<sup>a</sup>, Erzsébet Kiss-Bába<sup>a</sup>, Márta Gyöngyik<sup>a</sup>, István Papp<sup>a</sup>

**Table S1.** Target genes, oligonucleotide primers and expected product sizes in RT-PCRs and RT-qPCRs.

| Gene            | Accession<br>No | Forward primer<br>(5'-3') | Reverse primer<br>(5'-3') | Amplicon size<br>(bp) |
|-----------------|-----------------|---------------------------|---------------------------|-----------------------|
| <i>CsaPAO1</i>  | CsaV3_7G030830  | CCGTA CTGCTTCTCTGATTAC    | GGGAGGATGCGGATGATTTA      | 157                   |
| <i>CsaPAO2</i>  | CsaV3_4G032140  | GGGATTACCTCTGTACCGTA      | GCTAGTGACAAAAGTTGGGC      | 125                   |
| <i>CsaPAO3</i>  | CsaV3_2G001470  | GGAAGCCATTTTCGCCATGT      | GCGTAATCGAATCAATCGCC      | 160                   |
| <i>CsaPAO4</i>  | CsaV3_4G007490  | CCGTCTGTTATAGTGATCGG      | TGTGAGGAAAATCCGTTGGC      | 197                   |
| <i>CsaAPX1</i>  | CsaV3_6G021870  | CTTCGCTCGCATGGCA          | TGCCATTGAAGTTACTGGTGG     | 221                   |
| <i>CsaAPX2</i>  | CsaV3_2G032090  | CGACACGAGAACTAGTTGCACTATC | GAATGCTTGAGATGGATCAAAGAG  | 111                   |
| <i>CsaGPX1</i>  | CsaV3_4G036450  | ATCAAGTGCTGGAGGGTTT       | GAGATACCCACCAACAACATC     | 105                   |
| <i>CsaGR1</i>   | CsaV3_3G011090  | TACGATCTCTGGCCGACAAGAG    | CAGCACTGTTGGAATACACCCAT   | 182                   |
| <i>CsaGR2</i>   | CsaV3_7G027540  | CGTGGAAGATTCTGGATGAAC     | GCTCTAGAATTGCTGGCATC      | 216                   |
| <i>CsaLox1</i>  | CsaV3_2G006440  | AGGACTTCCTGTTCCATTGGA     | TCGTCTTAAGGAATTTCTCCA     | 229                   |
| <i>CsaLox4</i>  | CsaV3_2G006460  | GCAACTCATGGGTTTACCC       | GGAAAAGGAGAGCGTCAAG       | 156                   |
| <i>CsaLox8</i>  | CsaV3_2G005360  | TCCTGCTGACAAATACAAAACC    | CTTTTGGATCTTTTTTGAAGG     | 297                   |
| <i>CsaLox10</i> | CsaV3_2G005350  | TGGGAGAAGAAGCATACTTAGAGG  | GGAAGATAGCTCTGGTTGAGAAAG  | 286                   |
| <i>CsaLox17</i> | CsaV3_7G027160  | CCTCGTCGAATAAGAACTCTTC    | CCCTAAACTATCAACCTCCAC     | 180                   |
| <i>CsaLox19</i> | CsaV3_4G023920  | CTCATTGGCTGAGAACTCATTG    | TGAATTAAGTCAGCAGGTAAAGCT  | 271                   |
| <i>CsaLox20</i> | CsaV3_4G023930  | TTGCTTCCAATAAGATGGGAC     | TCCCGTTACAGGATCAACCT      | 264                   |
| <i>CsaLox22</i> | CsaV3_7G034390  | TCTCTAATAAGCCTTATCTTCAGGT | TGCAGTCATATCAGTCTCGGA     | 260                   |
| <i>CsaLox23</i> | CsaV3_5G030460  | TAAATCATTGGTTAAGGACTCACG  | CCATACCCCTTCGAATAAGATC    | 285                   |
| <i>Actin</i>    | CsaV3_2G018090  | TCGTGCTTGACTCTGGTGATGG    | ACAACCACTGCCGAACGGGAAA    | 171                   |
